# Supplementary material for: Mapping 10-m global impervious surface area (GISA-10m) using multi-source geospatial data
Source: Copernicus journal article supplement (doi:10.5194/essd-2021-458), 2022-04-12
Supplement: Supplementary file 1 [file essd-2021-458-supplement.pdf]

**Title page:**

*Supplementary Information for*

**Mapping 10-m global impervious surface area (GISA-10m) using multi-source geospatial data**

Xin Huang <sup>a,b</sup>, Jie Yang<sup>a,\*</sup>, Wenrui Wang <sup>a</sup>, Zhengrong Liu <sup>a</sup>

a School of Remote Sensing and Information Engineering, Wuhan University, Wuhan, 430079, P.R. China.

b State Key Laboratory of Information Engineering in Surveying, Mapping and Remote Sensing, Wuhan University, Wuhan, 430079, P.R. China.

\* Corresponding author. Email: Jie Yang (yang9tn@163.com)

**Supplementary Figures:**

**Fig.S1.** Global distribution of urban ecoregions and 30 selected grids.

**Fig.S2.** Global distribution of (a) Sentinel-1 and (b) Sentinel-2 images for 2016.

**Fig.S3.** Box plots of the overall accuracy for GISA-10m in the six continents by using (a) ISA<sub>RS</sub> and (b) ISA<sub>OSM</sub>.

**Table S1.** Results of quantitative accuracy assessment via visually-interpreted and ZY-3 samples between GISA-10m and the existing ISA datasets.

**Table S2.** Results of quantitative accuracy assessment via visually-interpreted and ZY-3 samples in rural regions between GISA-10m and the existing ISA datasets.

**Table S3.** Results of quantitative accuracy assessment via visually-interpreted and ZY-3 samples in arid regions between GISA-10m and the existing ISA datasets.

**Table S4.** Percentage of detected buildings in arid regions between GISA-10m and the existing ISA datasets.

**Fig.S1.** Global distribution of urban ecoregions and 30 randomly selected grids.

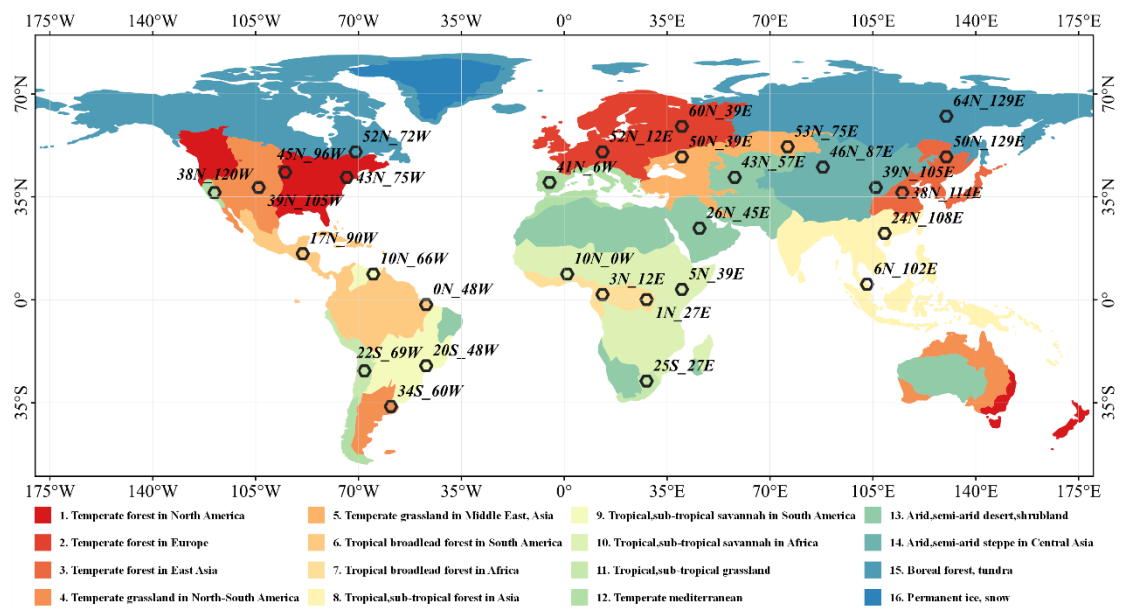

**Fig.S2.** Global distribution of (a) Sentinel-1 and (b) Sentinel-2 images for 2016.

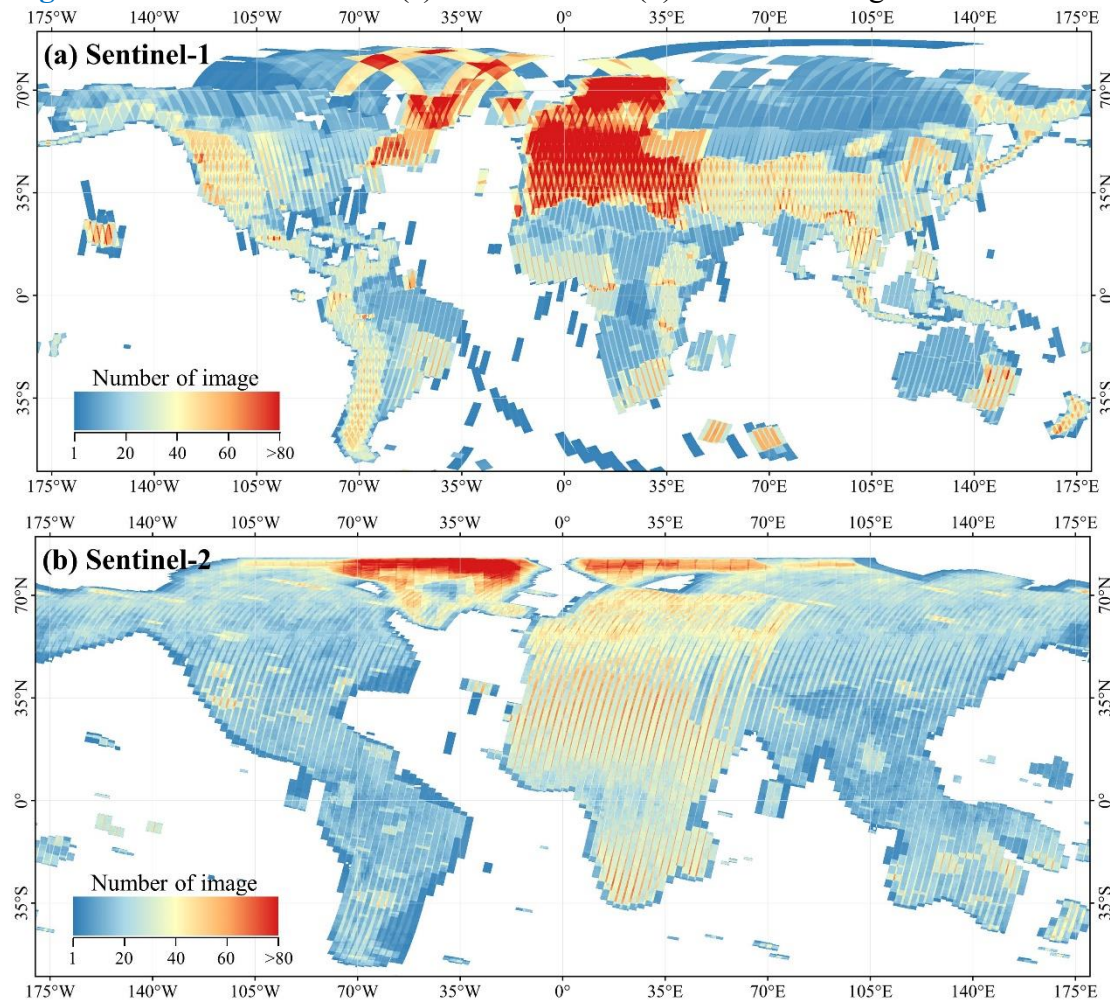

**Fig.S3.** Box plots of the overall accuracy for GISA-10m in the six continents by using (a)  $ISA_{RS}$  and (b)  $ISA_{OSM}$ .

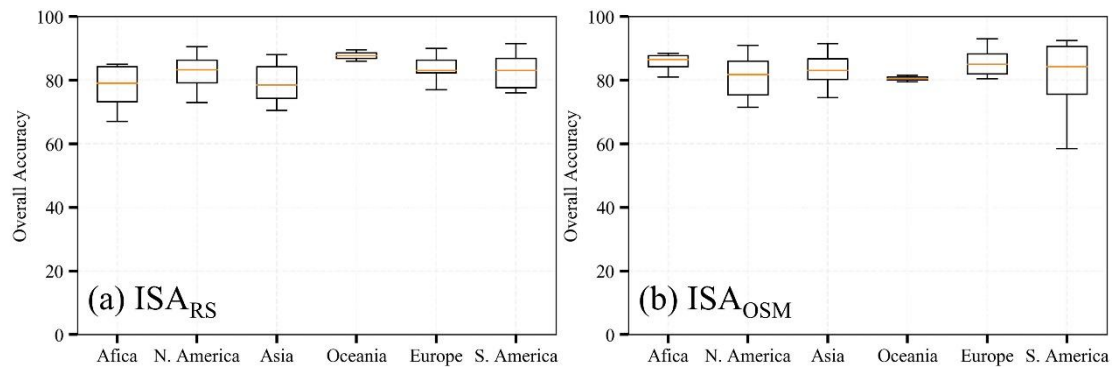

**Table S1.** Results of quantitative accuracy assessment via visually-interpreted and ZY-3 samples between GISA-10m and the existing ISA datasets. UA denotes the user's accuracy while PA means producer's accuracy.

| Globe      | Visually interpreted samples (n=10800) |               |                |                | ZY-3 samples (n=68368) |               |                |                |
|------------|----------------------------------------|---------------|----------------|----------------|------------------------|---------------|----------------|----------------|
|            | UA of ISA (%)                          | PA of ISA (%) | UA of NISA (%) | PA of NISA (%) | UA of ISA (%)          | PA of ISA (%) | UA of NISA (%) | PA of NISA (%) |
| GISA-10m   | 86.13                                  | 81.30         | 86.01          | 91.25          | 81.87                  | 71.35         | 87.87          | 92.92          |
| GHSL2018   | 90.20                                  | 69.74         | 79.96          | 95.14          | 74.44                  | 76.12         | 89.19          | 88.29          |
| GLCFCS     | 88.40                                  | 69.11         | 79.30          | 93.85          | 77.96                  | 69.84         | 87.09          | 91.15          |
| WSF2015    | 89.00                                  | 72.13         | 81.00          | 94.11          | 74.55                  | 80.36         | 90.88          | 87.71          |
| FROM_GLC10 | 89.35                                  | 57.07         | 73.98          | 95.55          | 75.83                  | 69.25         | 86.74          | 90.11          |
| GISA       | 90.97                                  | 57.75         | 74.34          | 96.24          | 77.09                  | 76.21         | 89.40          | 89.86          |
| GAUD       | 92.18                                  | 53.19         | 72.53          | 97.05          | 79.16                  | 72.53         | 88.14          | 91.45          |
| GAIA       | 90.78                                  | 53.25         | 72.48          | 96.47          | 72.89                  | 78.06         | 89.85          | 86.99          |

**Table S2.** Results of quantitative accuracy assessment via visually-interpreted and ZY-3 samples in rural regions between GISA-10m and the existing ISA datasets. UA denotes the user's accuracy while PA means producer's accuracy.

| Rural Regions | Visually interpreted samples (n=9547) |               |                |                | ZY-3 samples (n=43950) |               |                |                |
|---------------|---------------------------------------|---------------|----------------|----------------|------------------------|---------------|----------------|----------------|
|               | UA of ISA (%)                         | PA of ISA (%) | UA of NISA (%) | PA of NISA (%) | UA of ISA (%)          | PA of ISA (%) | UA of NISA (%) | PA of NISA (%) |
| GISA-10m      | 81.11                                 | 75.04         | 88.29          | 92.79          | 67.60                  | 42.86         | 92.73          | 97.26          |
| GHSL2018      | 87.66                                 | 63.04         | 84.11          | 96.5           | 53.12                  | 52.52         | 93.67          | 93.81          |
| GLCFCS        | 84.86                                 | 59.79         | 82.79          | 95.56          | 57.13                  | 41.87         | 92.51          | 95.81          |
| WSF2015       | 85.83                                 | 60.78         | 83.23          | 95.91          | 55.74                  | 47.09         | 93.08          | 95.01          |
| FROM_GLC10    | 84.34                                 | 43.14         | 77.77          | 96.78          | 52.04                  | 39.77         | 92.21          | 95.11          |
| GISA          | 88.11                                 | 37.42         | 76.28          | 98.03          | 62.12                  | 34.86         | 91.79          | 97.16          |
| GAUD          | 91.17                                 | 30.87         | 74.61          | 98.88          | 66.68                  | 24.99         | 90.76          | 98.33          |
| GAIA          | 88.43                                 | 28.45         | 73.94          | 98.57          | 54.88                  | 33.82         | 91.60          | 96.29          |

**Table S3.** Results of quantitative accuracy assessment via visually-interpreted and ZY-3 samples in rural regions between GISA-10m and the existing ISA datasets. UA denotes the user's accuracy while PA means producer's accuracy.

| Arid Regions | Visually interpreted samples (n=1020) |               |                |                | ZY-3 samples (n=10827) |               |                |                |
|--------------|---------------------------------------|---------------|----------------|----------------|------------------------|---------------|----------------|----------------|
|              | UA of ISA (%)                         | PA of ISA (%) | UA of NISA (%) | PA of NISA (%) | UA of ISA (%)          | PA of ISA (%) | UA of NISA (%) | PA of NISA (%) |
| GISA-10m     | 90.93                                 | 81.67         | 83.42          | 93.60          | 78.77                  | 81.17         | 93.50          | 92.53          |
| GHSL2018     | 93.33                                 | 79.84         | 81.83          | 95.16          | 75.74                  | 61.18         | 87.56          | 93.31          |
| GLCFCS       | 92.33                                 | 71.08         | 76.17          | 94.77          | 68.59                  | 76.78         | 91.73          | 87.99          |
| WSF2015      | 90.66                                 | 73.12         | 77.24          | 93.41          | 78.69                  | 74.49         | 91.45          | 93.11          |
| FROM_GLC10   | 90.79                                 | 58.25         | 69.79          | 95.35          | 69.30                  | 67.09         | 88.88          | 89.85          |
| GISA         | 93.31                                 | 65.38         | 73.52          | 96.32          | 75.11                  | 77.39         | 92.20          | 91.24          |
| GAUD         | 94.37                                 | 58.04         | 69.78          | 97.09          | 81.31                  | 71.99         | 90.80          | 94.35          |
| GAIA         | 92.48                                 | 60.08         | 70.61          | 95.93          | 70.94                  | 74.75         | 91.22          | 89.54          |

**Table S4.** Percentage of detected buildings in arid regions between GISA-10m and the existing ISA datasets.

| GISA-10m | GHSL2018 | GLCFCS | WSF2015 | FROM_GLC10 | GISA 30m | GAUD   | GAIA   |
|----------|----------|--------|---------|------------|----------|--------|--------|
| 92.68%   | 88.28%   | 86.85% | 90.92%  | 77.44%     | 84.66%   | 74.11% | 77.34% |
