# Supplementary material for: Mapping 10-m global impervious surface area (GISA-10m) using multi-source geospatial data
Source: Copernicus journal article supplement (doi:10.5194/essd-2021-458), 2022-04-12
Supplement: Supplementary file [file essd-2021-458-AC3-supplement.pdf]

The mapping of 10-m impervious surfaces at the global scale using multiple geodata sources is interesting. The authors applied temporal-spatial-spectral-geometrical rules to generate samples, and validation of the results is comprehensive and adequate. They also attempted to delineate the spatial distribution of impervious surface in urban and non-urban areas. The manuscript fits the journal's scope and the dataset is valuable, which is suitable for publication in ESSD. However, the paper still has some flaws (see my comments below) which should be further clarified or discussed before acceptance.

My major concern lies in the completeness and correctness of the OSM data. How about the effect of the geographic bias in spatial distribution of OSM data? More analysis is needed to discuss this issue.

R: Thank you for your comments. Given that geographic bias in the spatial distribution of OSM data may affect the mapping results, we applied temporal and spatial rules to mitigate the effect of the difference of the spatial distribution. In addition, spectral rule was used to remove potential errors in OSM-derived training samples (i.e.,  $ISA_{OSM}$ ). In fact, more than 82% of OSM ways are buildings and highways, whose total number exceeds 700 million (<https://taginfo.openstreetmap.org/keys>, last access: 20 June 2022). Therefore, OSM data provides a potential reference for large-scale ISA mapping, but it has rarely been employed in global ISA mapping. According to your comments, we calculated the overall accuracy for the test grids where the number of  $ISA_{OSM}$  training samples were less or larger than 2500 (i.e., the recommended size of training sample in Section 5.3). The results showed that the accuracy of these regions was similar to the global accuracy (Table R1). This phenomenon demonstrated the stable performance of GISA-10m. Moreover, global ISA mapping involved only  $ISA_{OSM}$  showed relatively stable accuracy across the continents (Fig. R1), suggesting that the refined OSM buildings and roads can reduce the impact of their uneven spatial distribution. Overall, although the spatial distribution of OSM data is uneven, we tried to balance its spatial distribution through a series of rules, and incorporated multi-source geospatial data (e.g., satellite-derived datasets) to reduce the impact of geographical bias on GISA-10m.

**Table R1.** Results of quantitative accuracy assessment for test grids with  $ISA_{osm}$  less or more than the recommended size via visually-interpreted samples. OA represents the overall accuracy.

| Type of test grids                     | OA (%) | Kappa  | F-Score of ISA (%) | F-Score of NISA (%) |
|----------------------------------------|--------|--------|--------------------|---------------------|
| $ISA_{osm}$ less than recommended size | 85.61  | 0.7021 | 81.79              | 89.01               |
| $ISA_{osm}$ more than recommended size | 86.23  | 0.7218 | 84.32              | 88.35               |
| All of the above                       | 86.06  | 0.7165 | 83.65              | 88.55               |

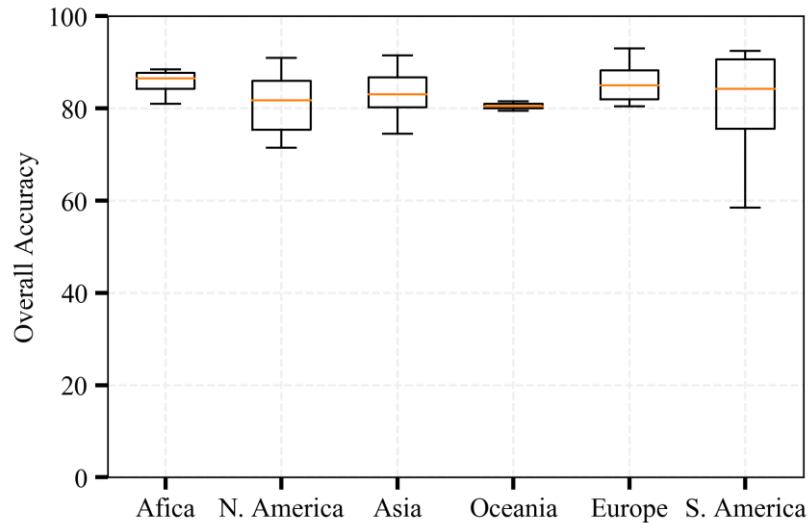

**Figure R1.** Box plots of the overall accuracy for GISA-10m in the six continents by using ISA<sub>OSM</sub>.

Line 10: “global ISA mapping” should be “global ISA datasets”

R: Corrected.

Line 21: “refined OSM data” -> “OSM data”.

R: Done.

Line 80-85: The GISA-10m dataset attempted to further delineate road regions from the ISA. This should be mentioned in the introduction and abstract.

R: Much obliged. Done.

Line 152: “multiple sources” is not clear, and can be modified as “multi-source datasets”.

R: Done.

Figure 1. It would be better to label each step, e.g., “Step 1. Training sample generation”.

R: Done.

Line 157. The authors selected the GlobeLand30 in 2010 but chosed other data (e.g., GISA and FROM-GLC) in 2016. Would the temporal gap between these data impact the quality of training data?

R: Thanks for your comments. In GlobeLand30, extensive visual interpretation was employed to detect artificial surfaces. Therefore, it was used in our study to effectively reduce false alarms from other datasets (i.e., GISA and FROM\_GLC10) (Chen et al., 2015). Although there is a six-year gap between GlobeLand30 and other datasets, we adopted the commonly used assumption that the transition from ISA to NISA rarely happened (Gong et al., 2020; Huang et al., 2021, 2022; Li and Gong, 2016), so that GlobeLand30 in 2010 can be used for GISA-10m mapping.

Reference:

Chen, J., Chen, J., Liao, A., Cao, X., Chen, L., Chen, X., He, C., Han, G., Peng, S., Lu, M., Zhang, W., Tong, X. and Mills, J.: Global land cover mapping at 30 m resolution: A POK-based operational approach, *ISPRS J. Photogramm. Remote Sens.*, 103, 7–27, doi:10.1016/j.isprsjprs.2014.09.002, 2015.

Gong, P., Li, X., Wang, J., Bai, Y., Chen, B., Hu, T., Liu, X., Xu, B., Yang, J., Zhang, W. and Zhou, Y.: Annual maps of global artificial impervious area (GAIA) between 1985 and 2018, *Remote Sens. Environ.*, 236, 111510, doi:10.1016/j.rse.2019.111510, 2020.

Huang, X., Li, J., Yang, J., Zhang, Z., Li, D., Liu, X., Xin, H., Jiayi, L., Jie, Y., Zhen, Z., Dongrui, L. and Xiaoping, L.: 30 m global impervious surface area dynamics and urban expansion pattern observed by Landsat satellites: From 1972 to 2019, *Sci. CHINA Earth Sci.*, doi:10.1007/s11430-020-9797-9, 2021.

Huang, X., Song, Y., Yang, J., Wang, W., Ren, H., Dong, M., Feng, Y., Yin, H. and Li, J.: Toward accurate mapping of 30-m time-series global impervious surface area (GISA), *Int. J. Appl. Earth Obs. Geoinf.*, 109, 102787, doi:https://doi.org/10.1016/j.jag.2022.102787, 2022.

Li, X. and Gong, P.: An “exclusion-inclusion” framework for extracting human settlements in rapidly developing regions of China from Landsat images, *Remote Sens. Environ.*, 186, 286–296, doi:https://doi.org/10.1016/j.rse.2016.08.029, 2016.

Line 171. How did you define edge pixels? I think the edge pixels are different between 30-m and 10-m images, as a non-edge pixel in a 30m image may be edge pixels in a 10m image. Could you clarify this issue?

R: Thanks for your comments. Edge pixels were defined as the outermost pixels of each ISA patch. We removed the edge pixels in each dataset, and then selected their ISA intersection as potential training samples. In this way, errors contained in non-edge pixels in the 30-m data (e.g., mixed pixels) can be removed by the edge pixels in the 10-m data. Moreover, we further applied the spectral rules to remove the erroneous samples.

Line 197. Why buildings with area less than 100 m<sup>2</sup> were excluded?

R: Thank you for your comments. We removed buildings with area less than 100 m<sup>2</sup> (~ a Sentinel pixel) to ensure the reliability of the sample. Because the training sample extracted from the geometric center may be NISA (Non-ISA), when the area of a building is smaller than a Sentinel pixel.

Line 210. Why did the authors remove the OSM samples intersected with those from other global datasets?

R: Thanks for your comment. In the field of supervised classification, the diversity of samples was important for the generalization ability of the classification model (Huang and Zhang, 2013). Considering that ISA<sub>OSM</sub> could overlies with ISA<sub>RS</sub>, we removed the ISA<sub>OSM</sub> samples intersected with ISA<sub>RS</sub> sample pool to increase the diversity and reduce the redundancy of the ISA samples.

Reference:

Huang, X., Zhang, L., 2013. An SVM Ensemble Approach Combining Spectral, Structural, and Semantic Features for the Classification of High-Resolution Remotely Sensed Imagery. *IEEE Trans. Geosci. Remote Sens.* 51, 257–272. https://doi.org/10.1109/TGRS.2012.2202912

Line 235. Please explain why these features were chosen.

R: Thank you for your comments. A total of 41 features were built for GISA-10m mapping in terms of spectrum, texture, phenology, SAR, and topography. Firstly, we used the spectral signatures provided by Sentinel-2 data to extract ISA in visible, red-edge, near-infrared and infrared bands. In addition, considering that spectral indices could increase the differences between land covers, we also extracted a series of normalized spectral indices to enhance the discrimination ability between ISA and NISA (Yang and Huang, 2021). The complex spectral and spatial characteristics in urban environments increase the difficulty of ISA mapping. In this regard, texture features are usually employed to depict the spatial information of urban ISA (Huang and Zhang, 2013). Therefore, we extracted GLCM textures to describe the spatial patterns of ISA. SAR data is potential for reducing the false alarms caused by bare soil in optical images, and it is more sensitive to buildings. In addition, it is able to penetrate clouds. So, in this study, it was combined with optical data for ISA mapping. Given that spectra and backscatter of some NISA (e.g., vegetation and water bodies) vary throughout time, the phenological information derived from multi-temporal spectral and SAR data is utilized to depict the temporal fluctuations. Topography-related features are necessary for ISA mapping, in order to reduce the confusion between complex terrain and buildings. For instance, topographical features could help to distinguish steeply hills from buildings.

Reference:

Huang, X. and Zhang, L.: An SVM Ensemble Approach Combining Spectral, Structural, and Semantic Features for the Classification of High-Resolution Remotely Sensed Imagery, *IEEE Trans. Geosci. Remote Sens.*, 51(1), 257–272, doi:10.1109/TGRS.2012.2202912, 2013.

Yang, J. and Huang, X.: The 30 m annual land cover dataset and its dynamics in China from 1990 to 2019, *Earth Syst. Sci. Data*, 13(8), 3907–3925, doi:10.5194/essd-13-3907-2021, 2021.

Line 286. How many RF models were built?

R: Thanks for your comment. We divided the global terrestrial surface using 1,808 hexagons where a local RF model was built for adaptive ISA classification in each hexagon. Therefore, a total of 1,808 RF models were built.

Line 293. How did the authors select the ISA test points? If the points were mostly located in urban areas, it might bias the assessment result. Could you provide the ISA density around these ISA points?

R: Thanks for your comments. The cluster sampling was used to determine the location of test samples (Stehman and Foody, 2019). Specifically, 59 grids ( $1^{\circ} \times 1^{\circ}$ ) were first randomly chosen across six continents based on population, ecoregion, and urban landscape. The ISA test samples were then obtained in each grid by random sampling and visual interpretation from high-resolution Google Earth images. In such way, samples from different urban sizes and densities were considered for validation. According to your suggestion, we provided the ISA density around the ISA test samples (0.5 km buffer). As seen from Fig. R2, the test samples involved not only high-density ISA samples in urban areas, but also a large number of low-density samples in suburban and rural regions. According to your suggestion, we have added this figure in the Figure 5.

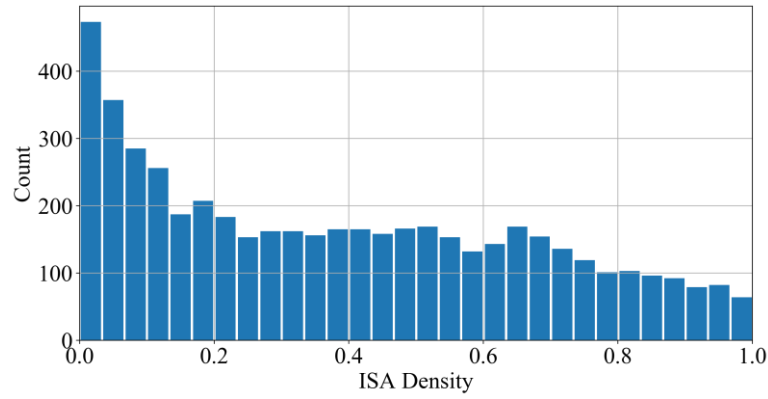

**Figure R2.** ISA density for ISA test samples.

Reference:

Stehman, S. V and Foody, G. M.: Key issues in rigorous accuracy assessment of land cover products, *Remote Sens. Environ.*, 231, 111199, doi:<https://doi.org/10.1016/j.rse.2019.05.018>, 2019.

[Figure 9.](#) It's interesting to see the accuracy in rural and arid areas. How about urban areas?

R: Thanks for your comment. In the case of urban region, GISA-10m exhibited satisfactory result with an overall accuracy similar to the global assessment (Table R2). Note that urban ISA only accounts for one-third of global ISA while nearly 70% of ISA was located in suburban and rural regions. Existing datasets showed relatively more ISA omissions in rural or arid regions, suggesting that global ISA mapping at 10-m (e.g., GISA-10m) is necessary. Moreover, we divided the visually-interpreted samples located in cities into three levels (i.e., small, middle and big cities) to assess the accuracy of GISA-10m over cities with different scales: Level 1 (population<250,000), Level 2 (250,000 to 1,000,000), and Level 3 (>1,000,000) (Larkin et al., 2016; Yang et al., 2019). It was found that the overall accuracy of GISA-10m across three level of cities was 85.35%, 87.43% and 85.42%, respectively (Table R3). The result indicated the performance of GISA-10m in different scales of cities was stable, and was also close to its global assessment (OA of 86.06%).

**Table R2.** Results of quantitative accuracy assessment via visually-interpreted and ZY-3 samples in urban regions between GISA-10m and the existing ISA datasets. OA represents the overall accuracy.

| Urban Regions | Visually interpreted samples (n=2253) |             |                    |                     | ZY-3 samples (n=24418) |             |                    |                     |
|---------------|---------------------------------------|-------------|--------------------|---------------------|------------------------|-------------|--------------------|---------------------|
|               | OA (%)                                | Kappa       | F-Score of ISA (%) | F-Score of NISA (%) | OA (%)                 | Kappa       | F-Score of ISA (%) | F-Score of NISA (%) |
| GISA-10m      | <b>85.49</b>                          | <b>0.30</b> | <b>91.93</b>       | <b>38.26</b>        | 77.96                  | <b>0.52</b> | 82.71              | <b>69.61</b>        |
| GHSL2018      | 76.61                                 | 0.20        | 86.02              | 31.41               | 76.56                  | 0.47        | 82.38              | 64.99               |
| GLCFCS        | 78.43                                 | 0.18        | 87.51              | 27.96               | 75.75                  | 0.48        | 80.98              | 66.55               |
| WSF2015       | 83.58                                 | 0.23        | 90.73              | 32.76               | <b>78.36</b>           | 0.49        | <b>84.64</b>       | 63.38               |
| FROM_GLC10    | 75.32                                 | 0.21        | 85.15              | 31.66               | 74.78                  | 0.45        | 80.35              | 64.80               |
| GISA          | 82.96                                 | 0.24        | 90.41              | 33.15               | 78.09                  | 0.49        | 84.25              | 63.98               |
| GAUD          | 81.49                                 | 0.22        | 89.49              | 31.06               | 78.20                  | 0.50        | 84.07              | 65.48               |
| GAIA          | 84.02                                 | 0.20        | 91.07              | 29.57               | 75.77                  | 0.41        | 83.30              | 55.83               |

**Table R3.** Results of quantitative accuracy assessment of GISA-10m for three level of cities: Level 1 (population<250,000), Level 2 (250,000 to 1,000,000), and Level 3 (>1,000,000). OA represents the overall accuracy.

| Level of cities | OA (%) | Kappa  | F-Score of ISA (%) | F-Score of NISA (%) |
|-----------------|--------|--------|--------------------|---------------------|
| Level 1         | 85.35  | 0.2205 | 91.92              | 30.41               |
| Level 2         | 87.43  | 0.2189 | 93.11              | 29.41               |
| Level 3         | 85.42  | 0.4005 | 91.86              | 47.06               |

Reference:

Characteristics and Air Quality in East Asia from 2000 to 2010, *Environ. Sci. Technol.*, 50(17), 9142–9149, doi:10.1021/acs.est.6b02549, 2016.

Yang, Q., Huang, X. and Tang, Q.: The footprint of urban heat island effect in 302 Chinese cities: Temporal trends and associated factors, *Sci. Total Environ.*, 655, 652–662, doi:10.1016/j.scitotenv.2018.11.171, 2019.

[Line 379. How did you divide the rural and urban areas?](#)

R: Thanks for your comment. We divided the terrestrial surface into rural and urban area using the global urban boundaries provided by Li et al., (2020).

Reference:

Li, X., Gong, P., Zhou, Y., Wang, J., Bai, Y., Chen, B., Hu, T., Xiao, Y., Xu, B., Yang, J., Liu, X., Cai, W., Huang, H., Wu, T., Wang, X., Lin, P., Li, X., Chen, J., He, C., Li, X., Yu, L., Clinton, N. and Zhu, Z.: Mapping global urban boundaries from the global artificial impervious area (GAIA) data, *Environ. Res. Lett.*, 15(9), 94044, doi:10.1088/1748-9326/ab9be3, 2020.

[Line 380. What do you mean by Global ISA?](#)

R: Thanks for your comment. "Global ISA" refers to the global impervious surface area revealed by GISA-10m. The corresponding sentence has been revised as: "*Global impervious surface area was mainly distributed in Asia (41.43%), North America (20.59%), Europe (18.93%), followed by Africa (9.78%) and South America (7.50%).*".

[Figure 14. The title of subgraph seems incorrect.](#)

R: Corrected.

[Figures 16 and 17 may be moved to the supplements.](#)

R: Done.

[Line 523. "difference" or " differences"](#)

R: Corrected.

Line 500: “distinguish well ISA from NISA” -> “distinguish ISA from NISA effectively”

R: Corrected.
